# Supplementary material
Source: publisher figshare collection journal article supplement (https://frontiersin.figshare.com/ndownloader/files/21787152)
Supplement: Supplementary file [file 21787152]

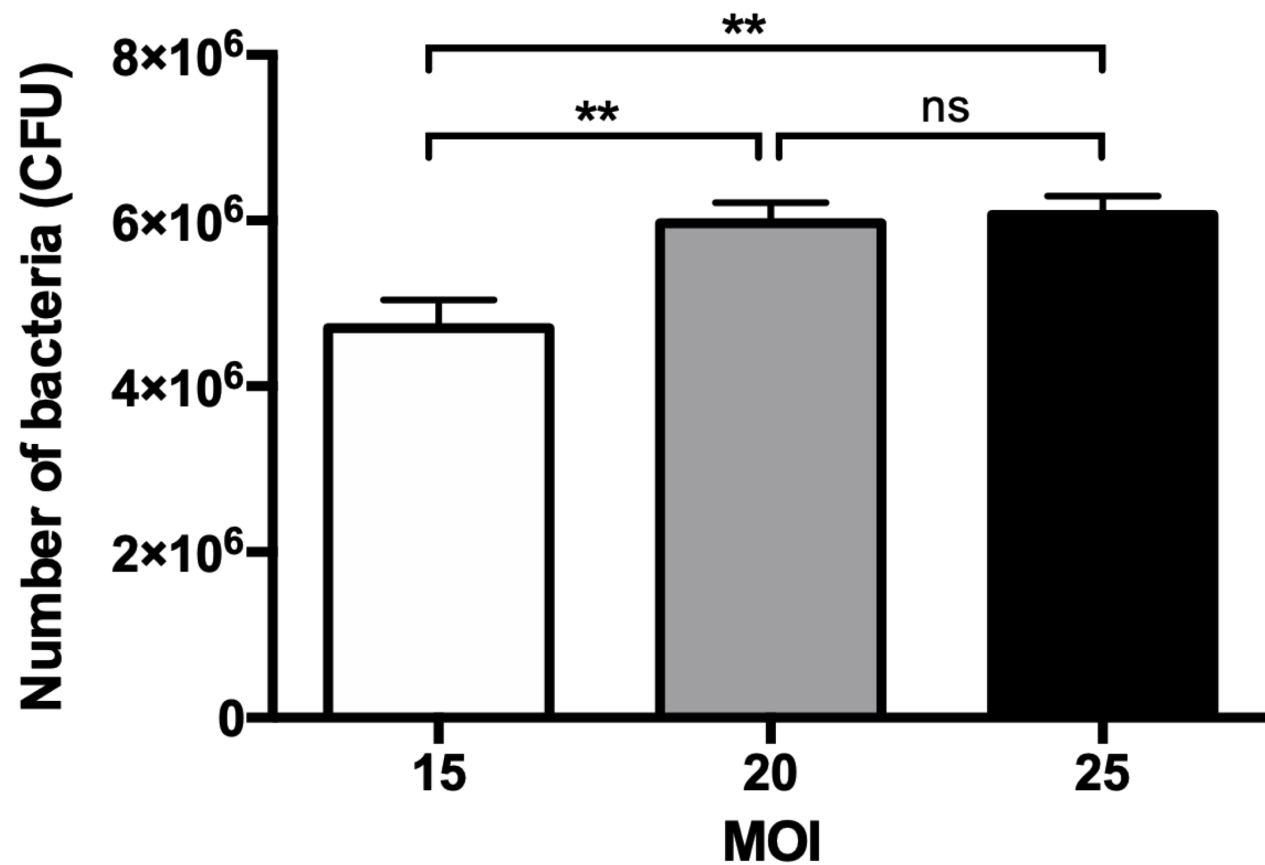

**Supplementary Figure 1.** Titration of MOI for macrophage infection with *B. thailandensis*. After infection of J774A.1 cells at different MOIs, the numbers of intracellular *B. thailandensis* were quantified. Values shown are the mean of three independent experiments. Asterisks indicate significant differences ( $P < 0.05$ ).
